# Supplementary material
Source: publisher site journal article supplement (https://www.dovepress.com/get_supplementary_file.php?f=266261.docx)
Supplement: Supplementary file 1 [file get_supplementary_file.php]

**High prevalence of abnormal ocular surface tests in a healthy pediatric population**

**Annexes**

William Rojas-Carabali1, Pilar Uribe-Reina1,2 MD, Juliana Muñoz-Ortiz2 MD, Juan Pablo Terreros-Dorado2 MD, María Eugenia Ruiz-Botero1, Nicolás Torres-Arias1, Juliana Reyes-Guanes1,2 MD, Alejandra Rodríguez1, José Arteaga-Rivera2 MD, Camilo Mosos2 MD, Ángela María Gutiérrez2 MD, Nicolás Molano-González3 MS, Guillermo Marroquín4 MD, Alejandra de-la-Torre1 MD, PhD

**Institutions:**

1. Research group in Neurosciences NeURos. Escuela de Medicina y Ciencias de la Salud, Universidad del Rosario, Carrera 24 # 63C – 69, Bogotá, Colombia
2. Escuela Superior de Oftalmología del Instituto Barraquer de América, Avenida Calle 100 No. 18A – 51, Bogotá, Colombia
3. Clinical Research Group. Escuela de Medicina y Ciencias de la Salud, Universidad del Rosario, Carrera 24 # 63C – 69, Bogotá, Colombia
4. Horus Grupo Oftalmológico, Carrera 19b #84 – 65, Bogotá, Colombia

**Corresponding author**

de-la-Torre Alejandra M.D, PhD

E-mail: [alejadelatorre@yahoo.com](mailto:alejadelatorre@yahoo.com)

Phone number: 2970200 ext. 3320

**Annex 1: Ocular surface tests techniques**

NITBUT: Non-invasive TBUT was measured through Oculus Keratograph 5M. In this technique, a Placido ring was projected on ocular surface and focused clearly. Subject was asked after one complete blink to stop blinking. Examiner observed the Placido ring’s lines and counted the time until these become distorted or diffused. Procedure was repeated three times and the average of three readings was recorded as non-invasive tear breakup time (NITBUT) by video keratograph.1–3

Meibography: Meibography was performed using the Oculus Keratograph 5M. The evaluation was based on the criteria proposed by Pult and Riede-Pult.4 The area of Meibomian glands loss was defined as the percentage of area without visible glands in relation to the total visible tarsal area and given a score from 0 to 4. Meibomian glands of upper and lower eyelid were visualized and graded. A score of 0 represented no atrophy; a score of 1, 0% to 25% MG loss; a score of 2, 25% to 50%; a score of 3, 50% to 75%; and a score of 4, >75%.2,3,5

Tear osmolarity: The tear osmolarity was measured using the TearLab Osmolarity System. Tear collection procedure was performed according to the user manual. The patient was seated with the head tilted upwards and eyes looking up. The tip of the osmometer was positioned just above the lower lid in the lateral canthal area, until the tip touched the thin line of the tear film. Successful tear collection was confirmed by a beeping sound and disappearance of the green light. The osmometer was placed into the reader immediately (5–10 seconds), the test card code was selected, the OK button was pressed, and the test result was obtained.3,6

Schirmer test: The Schirmer I test with anesthesia was performed applying a drop of proparacaine hydrochloride 0,5% in each aye, and then placing a Schirmer strips in the inferior conjunctival fornix. The measured length of wetting after a 5-minute period was recorded.3,5,7

Tear meniscus height: The tear meniscus height was measured through Oculus Keratograph 5M. The subjects were instructed to look at a central target in the system and blink normally. The image of lower tear meniscus was captured immediately after a full blink. Tear meniscus height was measured manually using cursors provided by the system.1–3

Lissamine green: Lissamine green staining was evaluated according to the Oxford grading, using a picture made with the Topcon DC 3 camara. We applied a single drop of lissamine green 1% solution in each eye and the subjects were instructed to blink gently after the instillation. One minute after instillation the picture was made and then analyzed.3,5,8

Fluorescein: Fluorescein staining was evaluated according to the Oxford grading, using a picture made with the Topcon DC 3 camara, two minutes after instillation of a single drop of fluorescein sodium 0,25% in each eye.3,5

Lipid layer thickness: The lipid layer thickness was obtained using Oculus Keratograph 5M. The subjects were instructed to maintain fixation on the camera, which recorded a 20-second video of the tear film. The lipid layer thickness was considered as thin or normal subjectively depending on the changes in colors observed by the examiners in the Oculus Keratograph 5M. The denomination was validated by two expert optometrists.2

Conjunctival redness: The conjunctival redness was measured through a picture made with the Topcon DC3 camara. The picture of exposed bulbar conjunctiva was scanned and analyzed by Oculus Keratograph 5M, and the system generated the score automatically based in the Jenvis Classification, which was based on the area percentage ratio between blood vessels and the rest of the scanned bulbar conjunctiva.1,2,9

Blink frequency: Spontaneous blinks were recorded using a high-speed video camera (Topcon DC 3). The subjects were instructed to read a text at a distance of 33 centimeters on paper and on-screen for 60 seconds, each one. All subjects read the text with best corrected visual acuity. The blinks were recorded and then calculated in blinks per minute.4,10

**References**

1. Xie W, Zhang X, Xu Y, Yao Y-F. Assessment of Tear Film and Bulbar Redness by Keratograph 5M in Pediatric Patients After Orthokeratology. *Eye Contact Lens*. 2018;44 Suppl 2:S382-S386. doi:10.1097/ICL.0000000000000501

2. O‘Flaherty C. OCULUS Keratograph® Workshop WAEPS 2016. Oral presentation presented at the: WAEPS 2016 Workshop; March 16, 2016; United States. Accessed January 21, 2020. https://pdfs.semanticscholar.org/db89/03cc34d8ffc62a70d65cb46cf60513bf71e3.pdf

3. Wolffsohn JS, Arita R, Chalmers R, et al. TFOS DEWS II Diagnostic Methodology report. *Ocul Surf*. 2017;15(3):539-574. doi:10.1016/j.jtos.2017.05.001

4. Pult H, Riede-Pult B. Comparison of subjective grading and objective assessment in meibography. *Cont Lens Anterior Eye*. 2013;36(1):22-27. doi:10.1016/j.clae.2012.10.074

5. Robin M, Liang H, Rabut G, Augstburger E, Baudouin C, Labbé A. The Role of Meibography in the Diagnosis of Meibomian Gland Dysfunction in Ocular Surface Diseases. *Trans Vis Sci Tech*. 2019;8(6):6-6. doi:10.1167/tvst.8.6.6

6. Tashbayev B, Utheim TP, Utheim ØA, et al. Utility of Tear Osmolarity Measurement in Diagnosis of Dry Eye Disease. *Scientific Reports*. 2020;10(1):5542. doi:10.1038/s41598-020-62583-x

7. Senchyna M, Wax MB. Quantitative assessment of tear production: A review of methods and utility in dry eye drug discovery. *j ocul biol dis inform*. 2008;1(1):1-6. doi:10.1007/s12177-008-9006-2

8. Bron AJ, Argüeso P, Irkec M, Bright FV. Clinical staining of the ocular surface: mechanisms and interpretations. *Prog Retin Eye Res*. 2015;44:36-61. doi:10.1016/j.preteyeres.2014.10.001

9. Wu S, Hong J, Tian L, Cui X, Sun X, Xu J. Assessment of Bulbar Redness with a Newly Developed Keratograph. *Optom Vis Sci*. 2015;92(8):892-899. doi:10.1097/OPX.0000000000000643

10. Nosch DS, Pult H, Albon J, Purslow C, Murphy PJ. Relationship between Corneal Sensation, Blinking, and Tear Film Quality. *Optom Vis Sci*. 2016;93(5):471-481. doi:10.1097/OPX.0000000000000827

**Annex 2**: **Random effects models to estimate means and proportions.**

The general model used to obtain those estimates is as follows (see for example ref):

and

Were is a quantitative variable measure at eye in subject , is the mean of the measure across both eyes for all the subjects, is a random effect, which accounts for variability between subjects and is a second random term which accounts for variability between eyes (see eq1).

In the case where the outcome is a binary variable (like thin or thick lipid bilayer, for example), we use eq2 in which is the logit (i.e. the logarithm of the odds) of the proportion of the outcome of interest at eye in subject , is the logit of the proportion across both eyes for all the subjects, and has the same meaning as before.

**Generalized Mixed effect models to estimate differences in eye level characteristics with profiles of device use**

The profiles of device use is a qualitative variable with three categories. Using a reference coding for qualitative variables, we need two dummy variables to encode this, in order to include this en the models, as shown below.

| Profile | Dpr1 | Dpr3 |
| --- | --- | --- |
| Pr1 | 1 | 0 |
| Pr2 | 0 | 0 |
| Pr3 | 0 | 1 |

Supplementary Table 1: reference coding for profiles of device use. Pr1, Pr2 and Pr3 are the three different profiles obtained by means of cluster analysis. Dpr1 and Dpr3 are the dummy variables needed to encode the profiles of device use and used latter on in the generalized mixed effect models.

Now we present the models used to assess associations of eye level characteristics with profiles of device use

As before, is a quantitative variable measure at eye in subject , and are now fixed effects which accounts for the effect of profiles of device use, is a random effect, which accounts for variability between subjects and is a second random term which accounts for variability between eyes (see eq3).

In the case where the outcome is a binary variable (like thin or thick lipid bilayer, for example), is the logit (i.e. the logarithm of the odds) of the proportion of the outcome of interest at eye in subject , and are now fixed effects which accounts for the effect of profiles of device use, and has the same meaning as before (see eq4).

Since reference coding was used, the interpretation of and in eq3 is as follows:

In short, is the mean of quantitative variable in profiles of device use category 2, is the mean difference of quantitative variable in profile 1 against profile 2, and similarly, is the mean difference of quantitative variable in profile 3 against profile 2, and similarly

Interpretation of fixed effects and , in eq4 is similar:

In short, is the logit of the proportion in profiles of device use category 2, is logarithm of the odds in profile 1 against profile 2, and similarly, is logarithm of the odds in profile 3 against profile 2, and similarly
